# Supplementary material
Source: HighWire-hosted journal article supplement (https://bjsm.bmj.com/content/bjsports-2020-102071)
Supplement: inline-supplementary-material-1 [file inline-supplementary-material-1.pdf]

Table S1. Single Leg and Tandem stance raw scores and associated percentiles (without skates;  $n = 1620$ ).

| <b>Raw Score</b> | <b>Single Leg Stance</b> | <b>Tandem Stance</b> |
|------------------|--------------------------|----------------------|
| <b>0</b>         | 88                       | 75                   |
| <b>1</b>         | 66                       | 39                   |
| <b>2</b>         | 44                       | 18                   |
| <b>3</b>         | 27                       | <b>9*</b>            |
| <b>4</b>         | 16                       | 4                    |
| <b>5</b>         | <b>9*</b>                | 2                    |
| <b>6</b>         | 5                        | 1                    |
| <b>7</b>         | 2                        |                      |
| <b>8</b>         | 1                        |                      |
| <b>9</b>         |                          |                      |
| <b>10</b>        |                          |                      |

NOTE: Only 12 players in the sample made an error on the double leg stance. No players made more than one error on the double leg stance. Cells that contain an asterisk (\*) represent the onset of the borderline low range (<16<sup>th</sup> percentile).

Table S2. Tandem gait time (sec) and associated percentiles.

| Raw (sec) | Tandem Gait Time w/o Skates (n = 201) | Tandem Gait Time With Skates (n = 127) |
|-----------|---------------------------------------|----------------------------------------|
| 4         | 100                                   | 99                                     |
| 5         | 99                                    | 99                                     |
| 6         | 97                                    | 98                                     |
| 7         | 91                                    | 96                                     |
| 8         | 83                                    | 93                                     |
| 9         | 72                                    | 88                                     |
| 10        | 61                                    | 80                                     |
| 11        | 49                                    | 70                                     |
| 12        | 39                                    | 60                                     |
| 13        | 30                                    | 51                                     |
| 14        | 23                                    | 43                                     |
| 15        | 17                                    | 36                                     |
| 16        | <b>13*</b>                            | 30                                     |
| 17        | 9                                     | 25                                     |
| 18        | 7                                     | 21                                     |
| 19        | 5                                     | 17                                     |
| 20        | 4                                     | <b>14*</b>                             |
| 21        | 3                                     | 12                                     |
| 22        | 2                                     | 10                                     |
| 23        | 1                                     | 8                                      |
| 24        | 1                                     | 7                                      |
| 25        | 1                                     | 6                                      |
| 26        |                                       | 5                                      |
| 27        |                                       | 4                                      |
| 28        |                                       | 4                                      |
| 29        |                                       | 3                                      |
| 30        |                                       | 3                                      |
| 31        |                                       | 2                                      |
| 32        |                                       | 2                                      |
| 33        |                                       | 2                                      |
| 34        |                                       | 1                                      |

NOTE: Cells that contain an asterisk (\*) represent the onset of the borderline low range (<16<sup>th</sup> percentile).

Table S3. Backwards Digit Span for English and non-English preference.

| Raw Score | AGE 18 |     | 21 |     | 24 |     | 27 |     | 30 |     | 33 |     | 36 |     |
|-----------|--------|-----|----|-----|----|-----|----|-----|----|-----|----|-----|----|-----|
|           | EP     | NEP | EP | NEP | EP | NEP | EP | NEP | EP | NEP | EP | NEP | EP | NEP |
| <b>0</b>  |        | 1   |    | 1   |    | 1   |    |     |    |     |    |     |    |     |
| <b>1</b>  | 3      | 6   | 2  | 5   | 2  | 5   | 2  | 4   | 1  | 3   | 1  | 3   | 2  | 2   |
| <b>2</b>  | 17     | 28  | 12 | 25  | 10 | 22  | 8  | 20  | 8  | 18  | 8  | 16  | 9  | 14  |
| <b>3</b>  | 46     | 63  | 37 | 60  | 32 | 57  | 29 | 54  | 28 | 50  | 28 | 47  | 30 | 44  |
| <b>4</b>  | 78     | 89  | 76 | 88  | 71 | 86  | 70 | 85  | 70 | 83  | 72 | 80  | 69 | 78  |

NOTE: EP=English preference, NEP=Non-English preference.

Figure S1. Symptom endorsement (full sample)

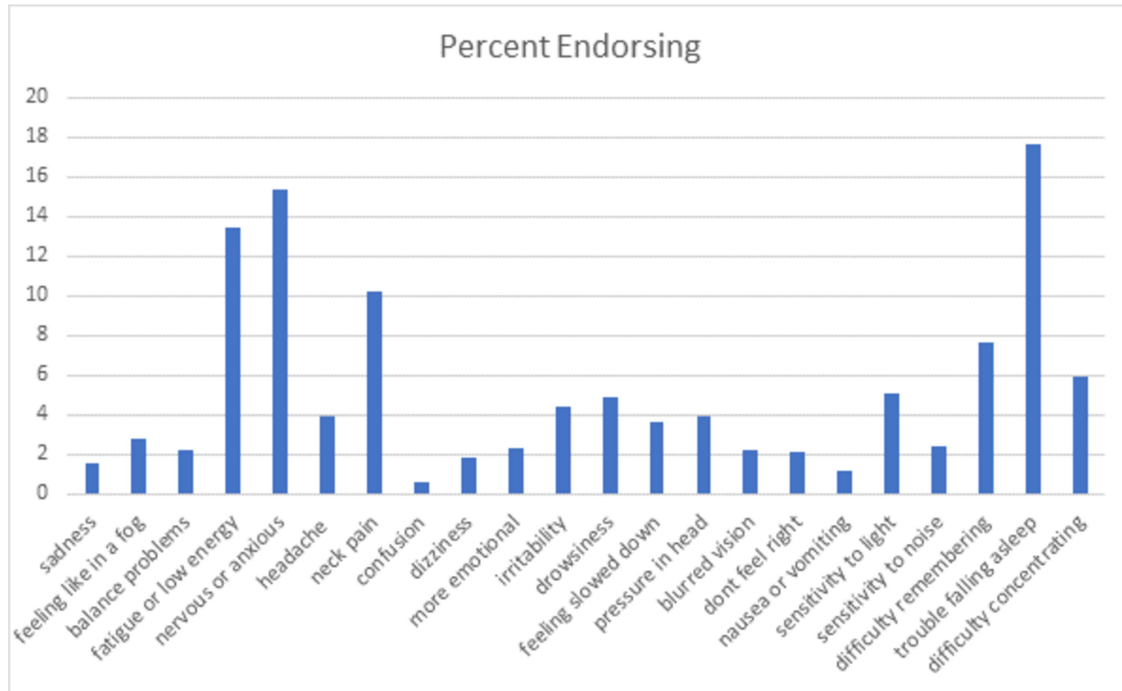

Figure S2. Norm score regression models plotting age (explanatory value) and raw scores.  
**Immediate Memory – English Language Preference**

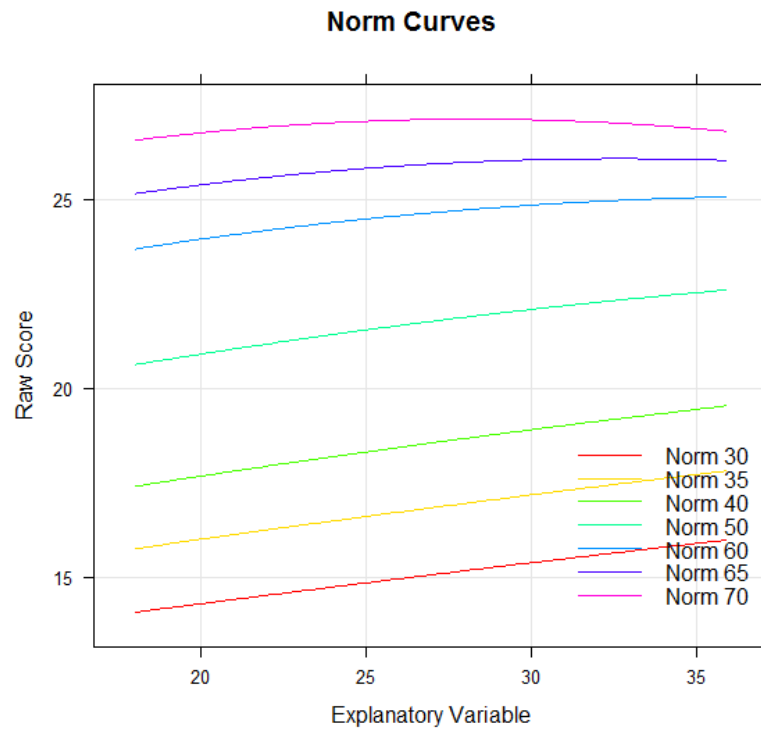

NOTE: Norm scores equal T score bands. Final solution: 3 terms  
R-Square Adj. = 0.99

Figure S3. Norm score regression models plotting age (explanatory value) and raw scores.  
**Immediate Memory – Non-English Preference**

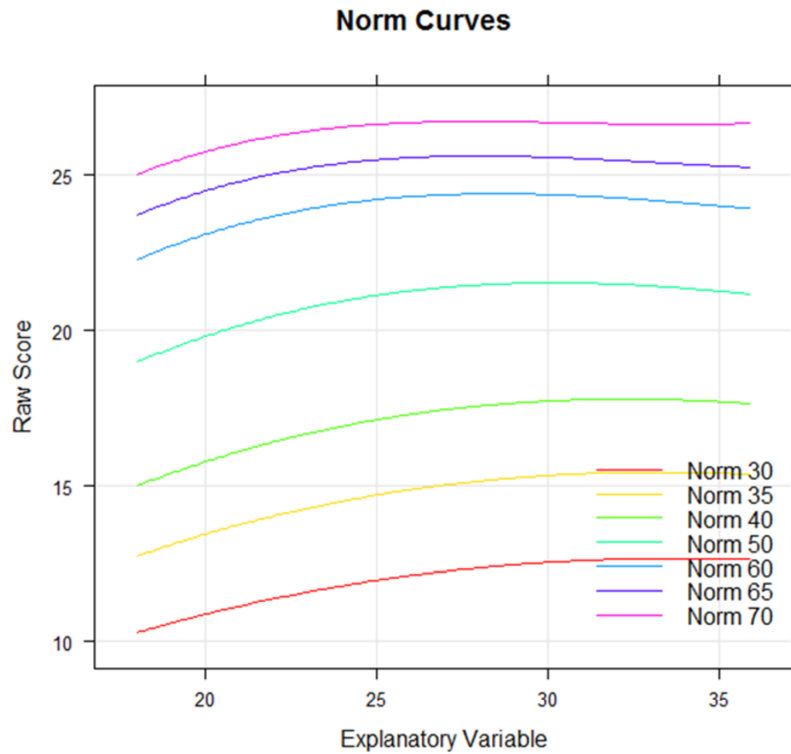

NOTE: Norm scores equal T score bands. Final solution: 4 terms  
R-Square Adj. = 0.97

Figure S4. Norm score regression models plotting age (explanatory value) and raw scores.  
**Delayed Recall Form 1**

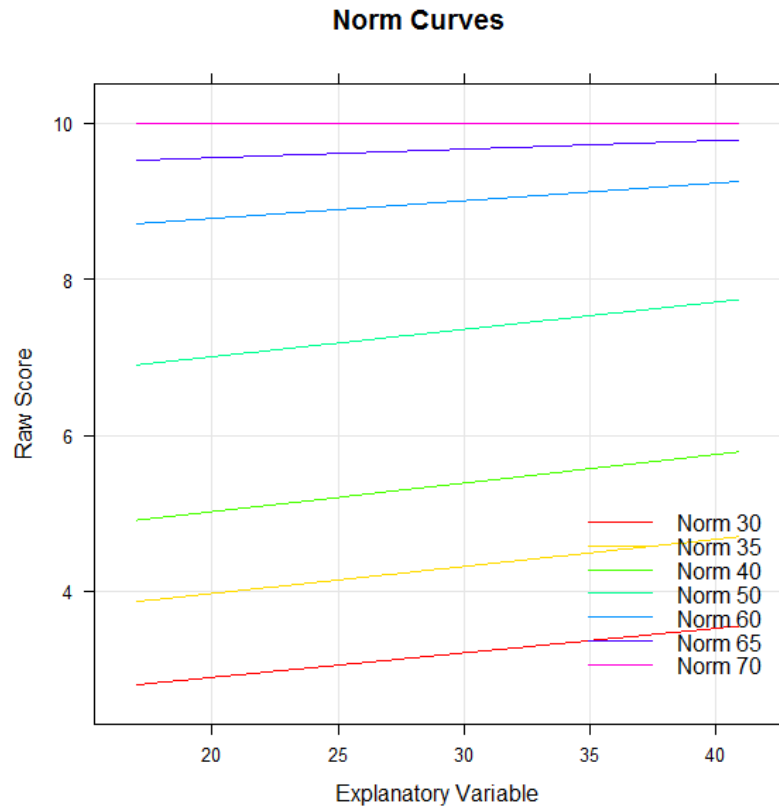

NOTE: Norm scores equal T score bands. Final solution: 3 terms  
R-Square Adj. = 0.99

Figure S5. Norm score regression models plotting age (explanatory value) and raw scores.  
**Delayed Recall Form 2**

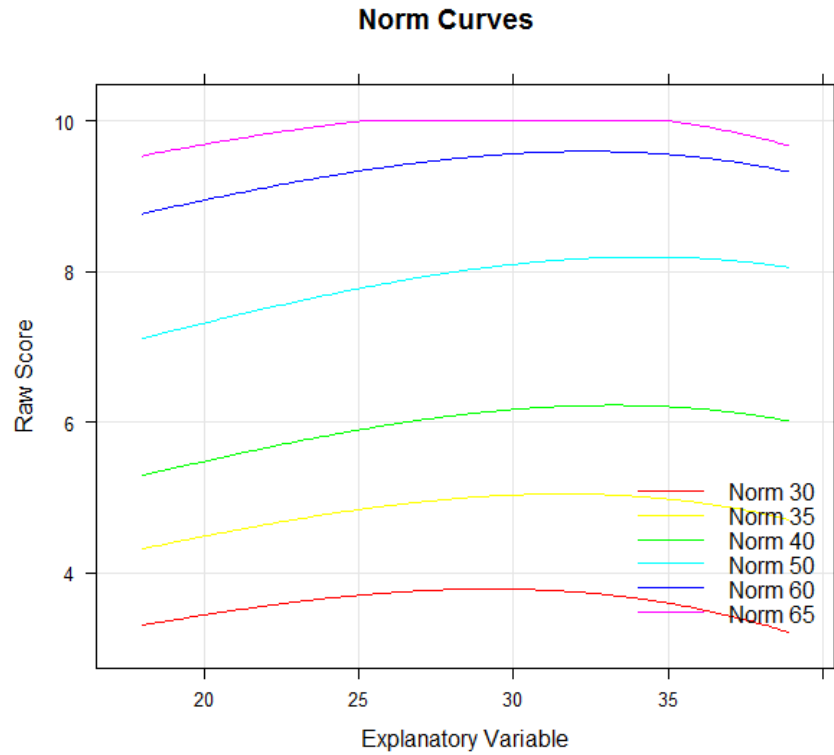

NOTE: Norm scores equal T score bands. Final solution: 4 terms  
R-Square Adj. = 0.99



Figure S6. Norm score regression models plotting age (explanatory value) and raw scores.  
**Delayed Recall Form 3**

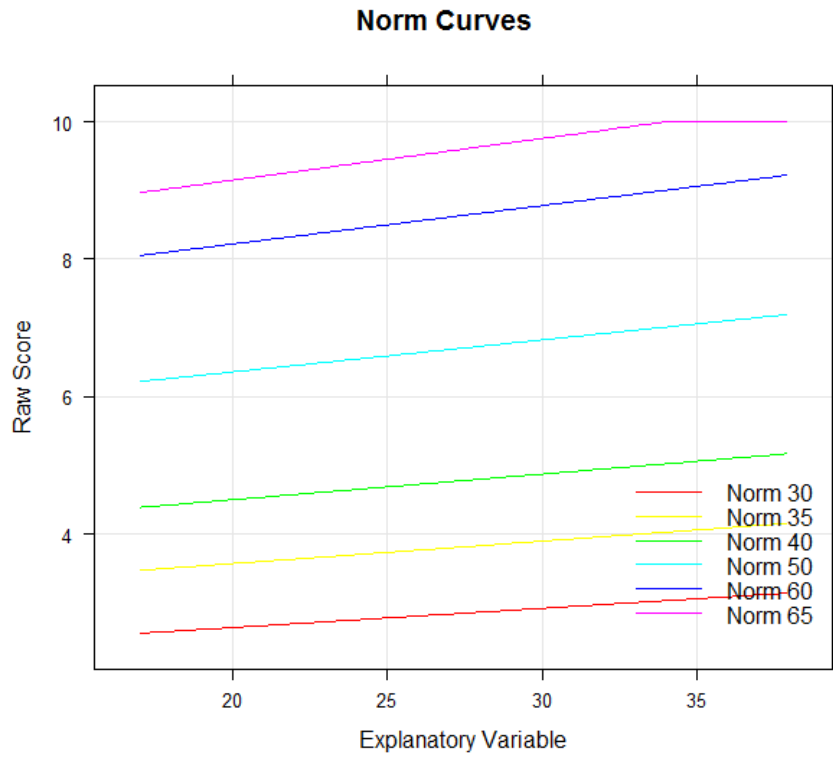

NOTE: Norm scores equal T score bands. Final solution: 2 terms  
R-Square Adj. = 0.99

Figure S7. Concentration - English Preference

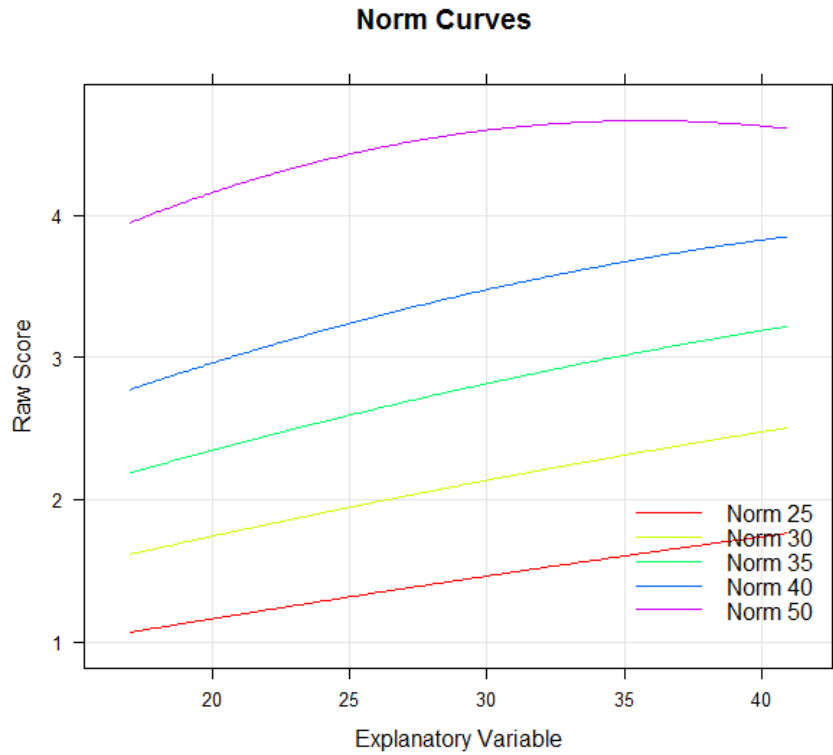

NOTE: Norm scores equal T score bands. User specified solution: 3 terms  
R-Square Adj. = 0.985418

Figure S8. Concentration - Non-English Preference

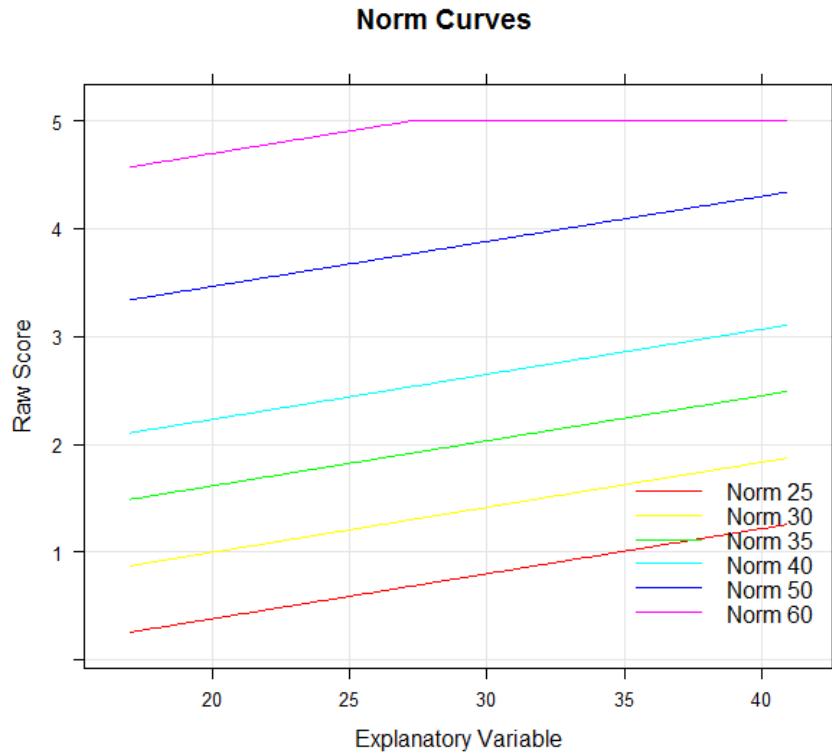

NOTE: Norm scores equal T score bands. Final solution: 2 terms  
R-Square Adj. = 0.991099

Figure S9. English Preference Backward Digits

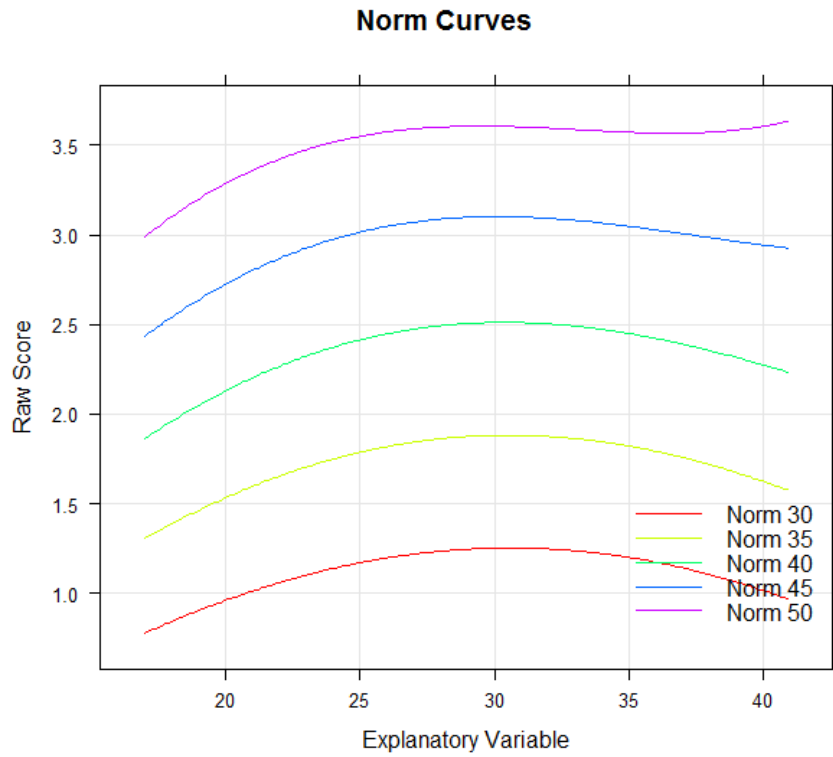

NOTE: Norm scores equal T score bands. Final solution: 4 terms  
R-Square Adj. = 0.992102

Figure S10. Backwards Digits - Non-English Preference

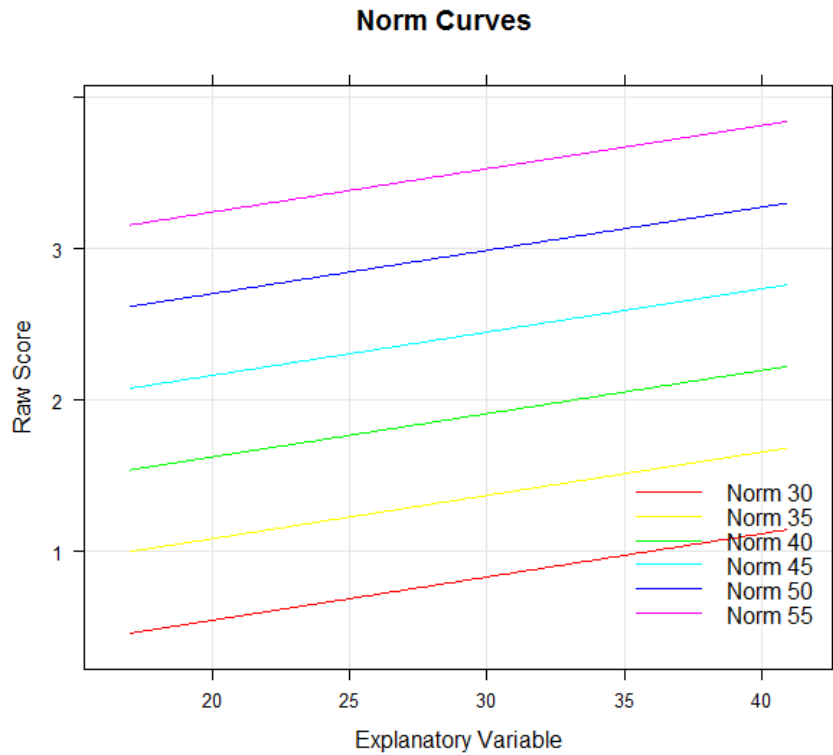

NOTE: Norm scores equal T score bands. Final solution: 2 terms  
R-Square Adj. = 0.994599
